# Supplementary material
Source: PubMed Central journal article supplement (PMC2234590)
Supplement: mend_me.2007-0340_1.pdf [file mend_me.2007-0340_1.pdf]

Supplementary table 2: Primer list.

| Gene name                                                   | Primer  | Sequence                          |
|-------------------------------------------------------------|---------|-----------------------------------|
| <b>RT-PCR primers</b>                                       |         |                                   |
| UDP glycosyltransferase 2 family, polypeptide               | Forward | 5-CGCAGAGTACAGCCCTTGGAT-3         |
|                                                             | Reverse | 5-GCATCGTGATATTCTCCAACCTC-3       |
| I (3) mbt like 2                                            | Forward | 5-AGAAGGCGGTTGGTTTGAGGAA-3        |
|                                                             | Reverse | 5-GGAAGATGGCGTGGGAAGA-3           |
| cAMP responsive element binding protein 3-like 2            | Forward | 5-ACTCGTTCGGTCTGTCACTCTG-3        |
|                                                             | Reverse | 5-CTCGGAGGGGTGGGCGGCAAAT-3        |
| hypotetical protein FLJ30707                                | Forward | 5-TGCGCTTCACCGTCTACTGT-3          |
|                                                             | Reverse | 5-AGCTCGCCTATGTCCCTCACTC-3        |
| spermatogenesis associated 13 (SPATA13)                     | Forward | 5-TGAAGACCAGAATGCTCCAGTG-3        |
|                                                             | Reverse | 5-GAGAATGTGAAGGGCCGGAACC-3        |
| eukaryotic translation elongation factor 1 epsilon 1        | Forward | 5-ACCAGGCCAAATCAGTGCTC-3          |
|                                                             | Reverse | 5-CAGAGGAGGCCAGTCAGAGAAG-3        |
| START domain containing 9                                   | Forward | 5-AAACTTTACTAGAACCCGAATG-3        |
|                                                             | Reverse | 5-GTTTCCGTATTGGGCAGAGATT-3        |
| protocadherin 11 X-linked                                   | Forward | 5-ACCCCATGAAAGAGTCTACAA-3         |
|                                                             | Reverse | 5-AGTTGCCATCCCCTTCAGTGCG-3        |
| COMM domain containing 3                                    | Forward | 5-CTCCAACGCCTTCACGCTTCTC-3        |
|                                                             | Reverse | 5-AGTTCTATTCGCTCTCTGTCAA-3        |
| H19, imprinted maternally expressed untranslated mRNA (H19) | Forward | 5-AGC GGG TCT GTT TCT TTA CTT C-3 |
|                                                             | Reverse | 5-TCACCTTCCAGAGCCGATTCCT-3        |
| EMI domain containing 2                                     | Forward | 5-CGGGAGCAACTGTGATGAGGAA-3        |
|                                                             | Reverse | 5-CGTGGGCCTTCTCTGTCTGTG-3         |
| naked cuticle homolog (NKD)                                 | Forward | 5-CAGCCAGAGCAAGAGGAGCGTC-3        |
|                                                             | Reverse | 5-CCGGCGAGATCTAAGTAGTGGT-3        |
| chromosome 10 open reading frame 11                         | Forward | 5-ACCCTCAACAAGAACCGAATCA-3        |
|                                                             | Reverse | 5-CTCTGACCAACGCCTCCTCT-3          |
| calcium channel L-type alpha 1B subunit                     | Forward | 5-GTAACAGAGATTGCGGAAACGA-3        |
|                                                             | Reverse | 5-GGTGTCATCATCCAGGGCAATA-3        |
| astrotactin                                                 | Forward | 5-AAAGCGGATCAACAACAAAGCA-3        |
|                                                             | Reverse | 5-TGCAGGGTGATCTTGACAACGA-3        |
| putative nuclear protein ORF1-FL49                          | Forward | 5-ACTTATCCACCACAACCAAT -3         |
|                                                             | Reverse | 5-CAGGTGAGCATGTCCCAGAG-3          |
| adenosine deaminase RNA specific B1                         | Forward | 5-ACCAGCAGATAGACACCCAAAT-3        |
|                                                             | Reverse | 5-AAGGCTGCCAGGATGATGCTC-3         |
| plasminogen like                                            | Forward | 5-AGAGCCCCTGGATGACTATGTG-3        |
|                                                             | Reverse | 5-AATAAACTGCATCTCTCATCC-3         |
| cytoplasmic polyadenylation element bp 4                    | Forward | 5-CCTTGAATCTCAGTGACAG-3           |
|                                                             | Reverse | 5-TCCACCCGTTTATCTATCTCTC-3        |
| protein tyrosine phosphatase, receptor type, M              | Forward | 5-GGTCAAATCTCGGCAAATC-3           |
|                                                             | Reverse | 5-TATGAGTTCTTGGCTTTCCTTC-3        |
| RNA binding motif single strand interacting protein         | Forward | 5-ATTATCTCAAACCAAGCAGTC-3         |
|                                                             | Reverse | 5-CCATAACCTTTCGACTGATTTG-3        |

|                                                             |         |                              |
|-------------------------------------------------------------|---------|------------------------------|
| CUB and sushi multiple domains1                             | Forward | 5-TGGCAGAATTATTTGATGGAAC-3   |
|                                                             | Reverse | 5-TCGGGGACAGAGCTGCATTGGG-3   |
| fibroblast growth factor 12                                 | Forward | 5-CGAGCTTGGTTTCTGGGACT-3     |
|                                                             | Reverse | 5-ATTCACAACCTTTGCCTCCATT -3  |
| glutamate receptor ionotropic kainate 2                     | Forward | 5-AGCCTTCCGCAACCTAA-3        |
|                                                             | Reverse | 5-CTTCACTCCAGTAGCCAATCTT-3   |
| glutamate receptor ionotropic kainate 4                     | Forward | 5-TCGTGTCCGCAAATCCAAG-3      |
|                                                             | Reverse | 5-CCGCCAACCCAGAATGTAGAAGA-3  |
| phosphodiesterase 8B                                        | Forward | 5-GGTGATCCTCGCAGTGGTTT-3     |
|                                                             | Reverse | 5-CGTGGTCATCGCTTGTATTTC-3    |
| solute carrier family 19 member 1                           | Forward | 5-CGCATCGCCTATTCTCCTACA-3    |
|                                                             | Reverse | 5-TCGCGGTTGAAGAAGAGGCTGC-3   |
| calbindin 2,29kDa                                           | Forward | 5-TGGAAGCACTTTGACGCAGAC -3   |
|                                                             | Reverse | 5-AGTTCTCTTCGGTTGGCAGGAT-3   |
| oligodendrocyte lineage transcription factor 2              | Forward | 5-CGTCCAGCACCTCGTCGTCT-3     |
|                                                             | Reverse | 5-CCAGTCGCTTCATCTCCTCCAG-3   |
| single-stranded DNA binding protein 2                       | Forward | 5-GTCCCAGGAAGTCAGCCATTAC-3   |
|                                                             | Reverse | 5-CACCTGGACCCATGTTTCATT-3    |
| fem-1 homolog b                                             | Forward | 5-TGACTCTGGCCGCCTTGCTTCT-3   |
|                                                             | Reverse | 5-TGGCACCATCAATGACATACCC-3   |
| retinal outer segment membrane protein 1                    | Forward | 5-TGGCGTCATCCTCCTCTGTAGT-3   |
|                                                             | Reverse | 5-CATCCAGACTCCCAGGCAAAGC-3   |
| solute carrier family 4                                     | Forward | 5-TTTGCCACATAGAACAGGAACC-3   |
|                                                             | Reverse | 5-CCGCAAACAAGGAATAAGCAA-3    |
| killer cell lectin-like receptor subfamily C (NKG2E)        | Forward | 5-GCCAGCATTTTACCTTCCTCAT-3   |
|                                                             | Reverse | 5-AACATGATGAAACCCCGTCTAA-3   |
| cat eye syndrome chromosome region candidate 6 (CECR6)      | Forward | 5-ACAGTCGGTGTGGAATGTC-3      |
|                                                             | Reverse | 5-AGAAGGGGAGAAGGGGAAACA-3    |
| <b>ChIP primers</b>                                         |         |                              |
| cat eye syndrome chromosome region candidate 6 (CECR6)      | Forward | 5-TGATAAATGCTAGTGAGGTGCC-3   |
|                                                             | Reverse | 5-AGAACCGCCTGCTCCTAACAAAT-3  |
| naked cuticle homolog (NKD)                                 | Forward | 5-GGGTCAGGACGAGTGTTTTCTT-3   |
|                                                             | Reverse | 5-ACCCCGGACCAAATTTTCAGTTA-3  |
| killer cell lectin-like receptor subfamily C (NKG2)         | Forward | 5'-AGCCACCCAAAGTCTCCTAT-3'   |
|                                                             | Reverse | 5'-TTCAGTGGAGAGGTCAGGTT-3'   |
| H19, imprinted maternally expressed untranslated mRNA (H19) | Forward | 5'-GACACGTCCCCCTTCTCTCCGA-3' |
|                                                             | Reverse | 5'-TTCGTCCCGCTTGCCCCACAGA-3' |
| lethal giant larve homolog 2 (LLGL2)                        | Forward | 5'-AGGTGTTACGCTGCCCAAGGT-3'  |
|                                                             | Reverse | 5'-CCCGGCGGATGCAGCTGTAG-3'   |
| spermatogenesis associated 13 (SPATA13)                     | Forward | 5'-AGCCATGTCCTACTTCTCTCCC-3' |
|                                                             | Reverse | 5'-CAGCACACGTGGCCACCTCCTT-3' |
